# Supplementary material for: The enhancement of ozone–liquid mass transfer performance in a PTFE hollow fiber membrane contactor using ultrasound as a catalyzer
Source: Royal Society of Chemistry journal article supplement (doi:10.1039/d1ra00452b), 2021-01-01
Supplement: d1ra00452b1.pdf [file d1ra00452b1.pdf]

Table S1 Various the electricity of the ozone generator corresponding to the gaseous ozone concentrations

| Electricity (A)                    | 0.2  | 0.4   | 0.6   | 0.8   |
|------------------------------------|------|-------|-------|-------|
| Gaseous ozone concentration (mg/L) | 2.59 | 12.58 | 32.38 | 43.92 |

Table S2 The pseudo-first-order rate constants under different reaction systems.

| Reaction system      | k [min <sup>-1</sup> ] |
|----------------------|------------------------|
| O <sub>3</sub> /US   | 5.39×10 <sup>-2</sup>  |
| O <sub>3</sub> alone | 2.08×10 <sup>-2</sup>  |
| US alone             | 1.53×10 <sup>-3</sup>  |

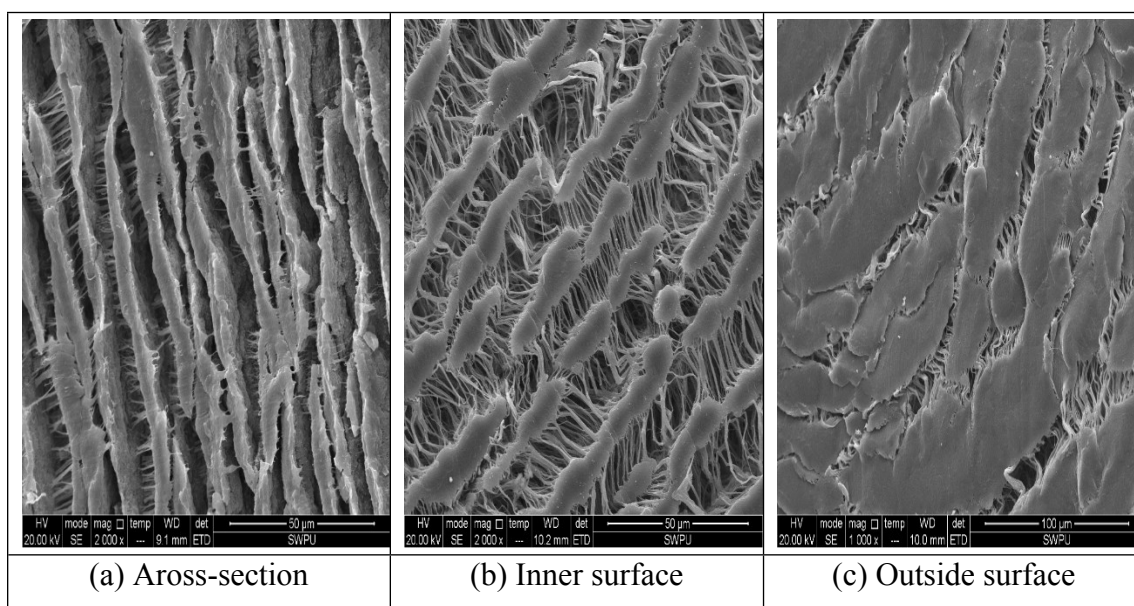

Fig. S1. SEM images of PTFE hollow fiber membrane
